# Supplementary material
Source: PubMed Central journal article supplement (PMC544504)
Supplement: plntcell_tpc.104.026971_2.pdf [file plntcell_tpc.104.026971_2.pdf]

# Supplementary Figure 2

RNA digestion plot

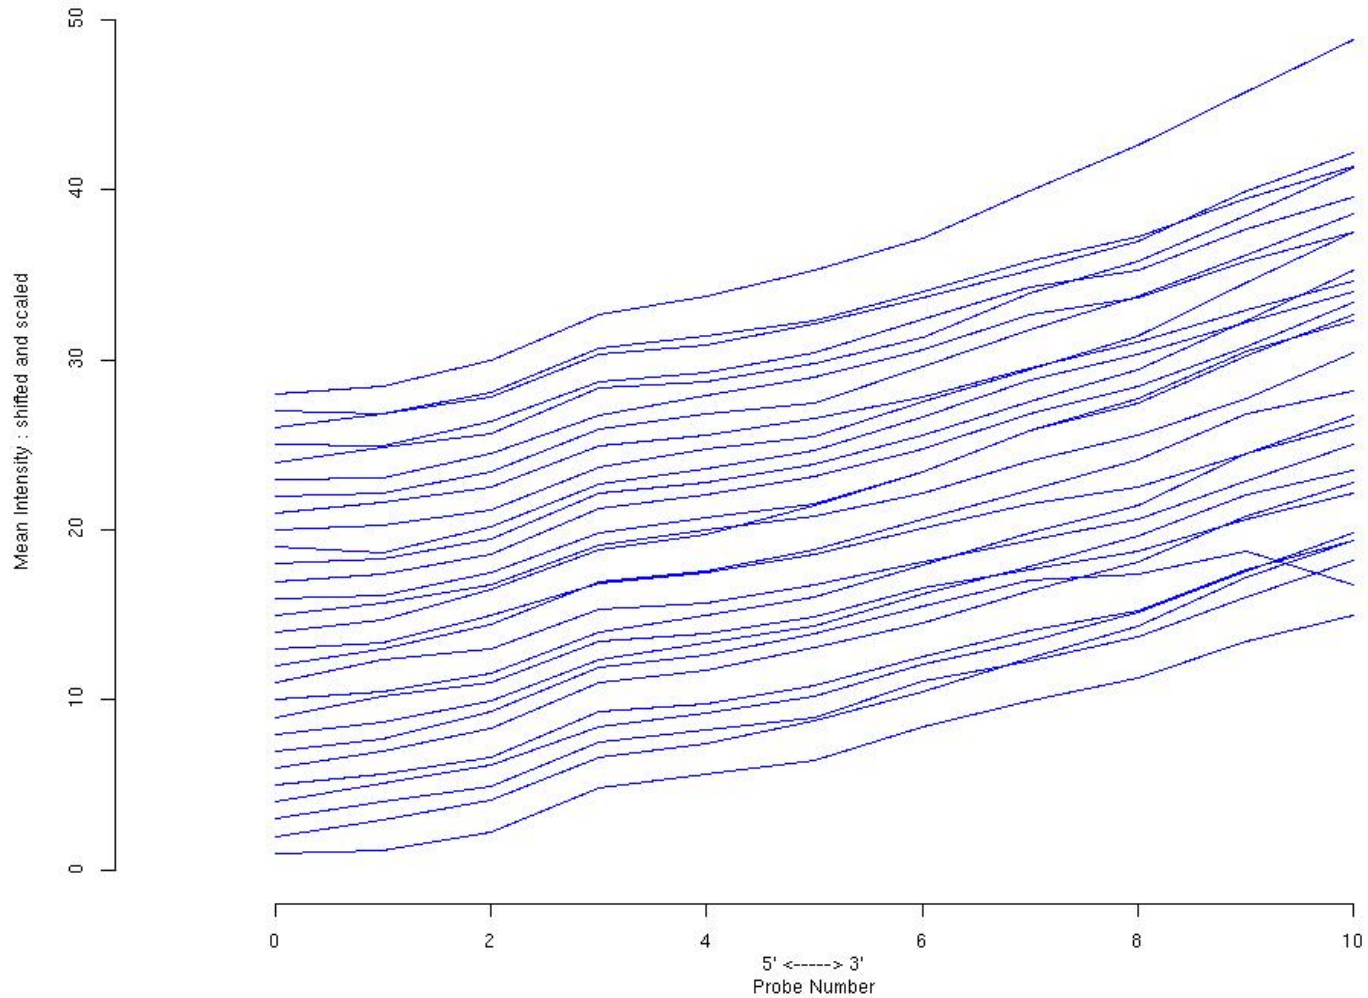

Degradation plot of the RNA for each of 28 arrays.

Probe intensities are expected to be lower at 5' end than at 3' end.
