# Supplementary material
Source: PubMed Central journal article supplement (PMC544504)
Supplement: plntcell_tpc.104.026971_4.pdf [file plntcell_tpc.104.026971_4.pdf]

# Supp Table 5

## Correlation of Replicated Experiments

| Experiment | Pearson | Spearman |
|------------|---------|----------|
| WT1.0m     | 0.9906  | 0.9899   |
| WT1.15m    | 0.9941  | 0.9933   |
| WT1.30m    | 0.9906  | 0.9892   |
| WT1.90m    | 0.9827  | 0.9777   |
| WT1.3h     | 0.9951  | 0.9943   |
| WT1.6h     | 0.9938  | 0.993    |
| WT1.24h    | 0.993   | 0.9917   |
| KO1.0m     | 0.9932  | 0.9928   |
| KO1.15m    | 0.9943  | 0.9938   |
| KO1.30m    | 0.9945  | 0.9936   |
| KO1.90m    | 0.9952  | 0.9944   |
| KO1.3h     | 0.9934  | 0.9929   |
| KO1.6h     | 0.9951  | 0.9942   |
| KO1.24h    | 0.9923  | 0.9917   |
