# Supplementary material
Source: PubMed Central journal article supplement (PMC544504)

# Supplementary Figure 1

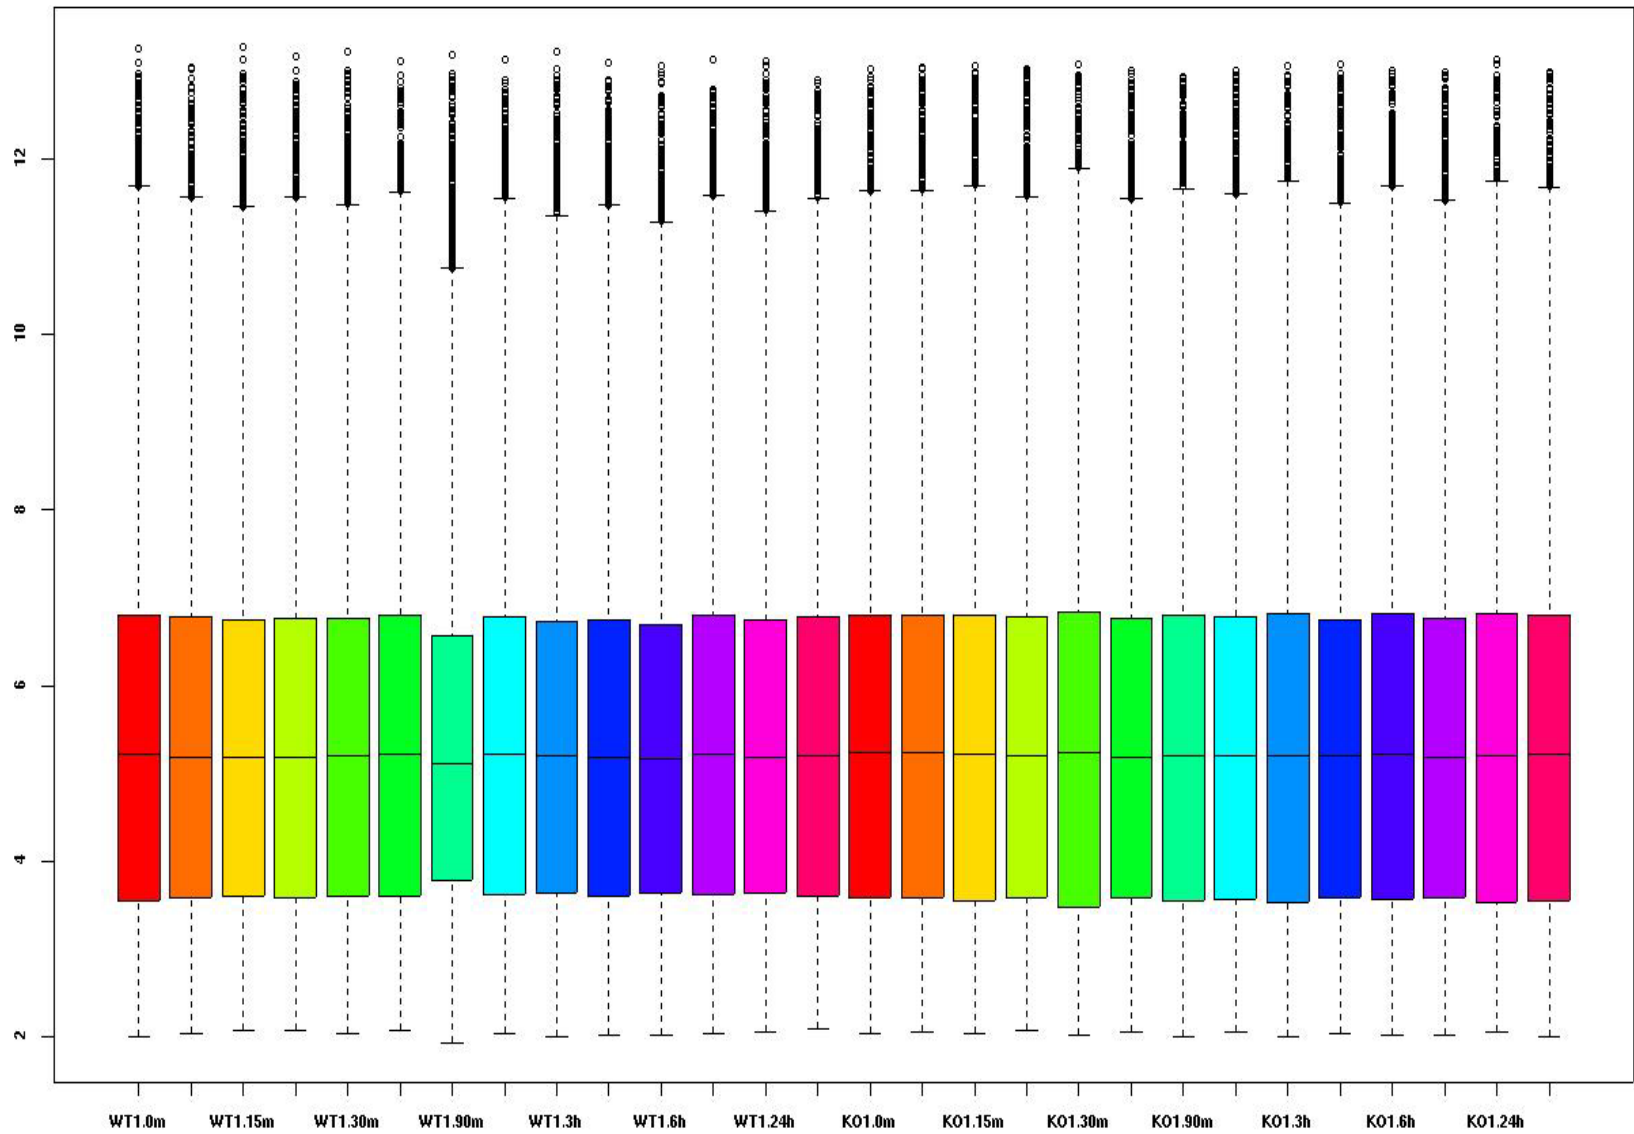

Boxplot of RMA values of All 28 Arrays

Supplement: plntcell_tpc.104.026971_1.pdf [file plntcell_tpc.104.026971_1.pdf]

# Supplementary Figure 3

Replicates of WT1.6h After RMA

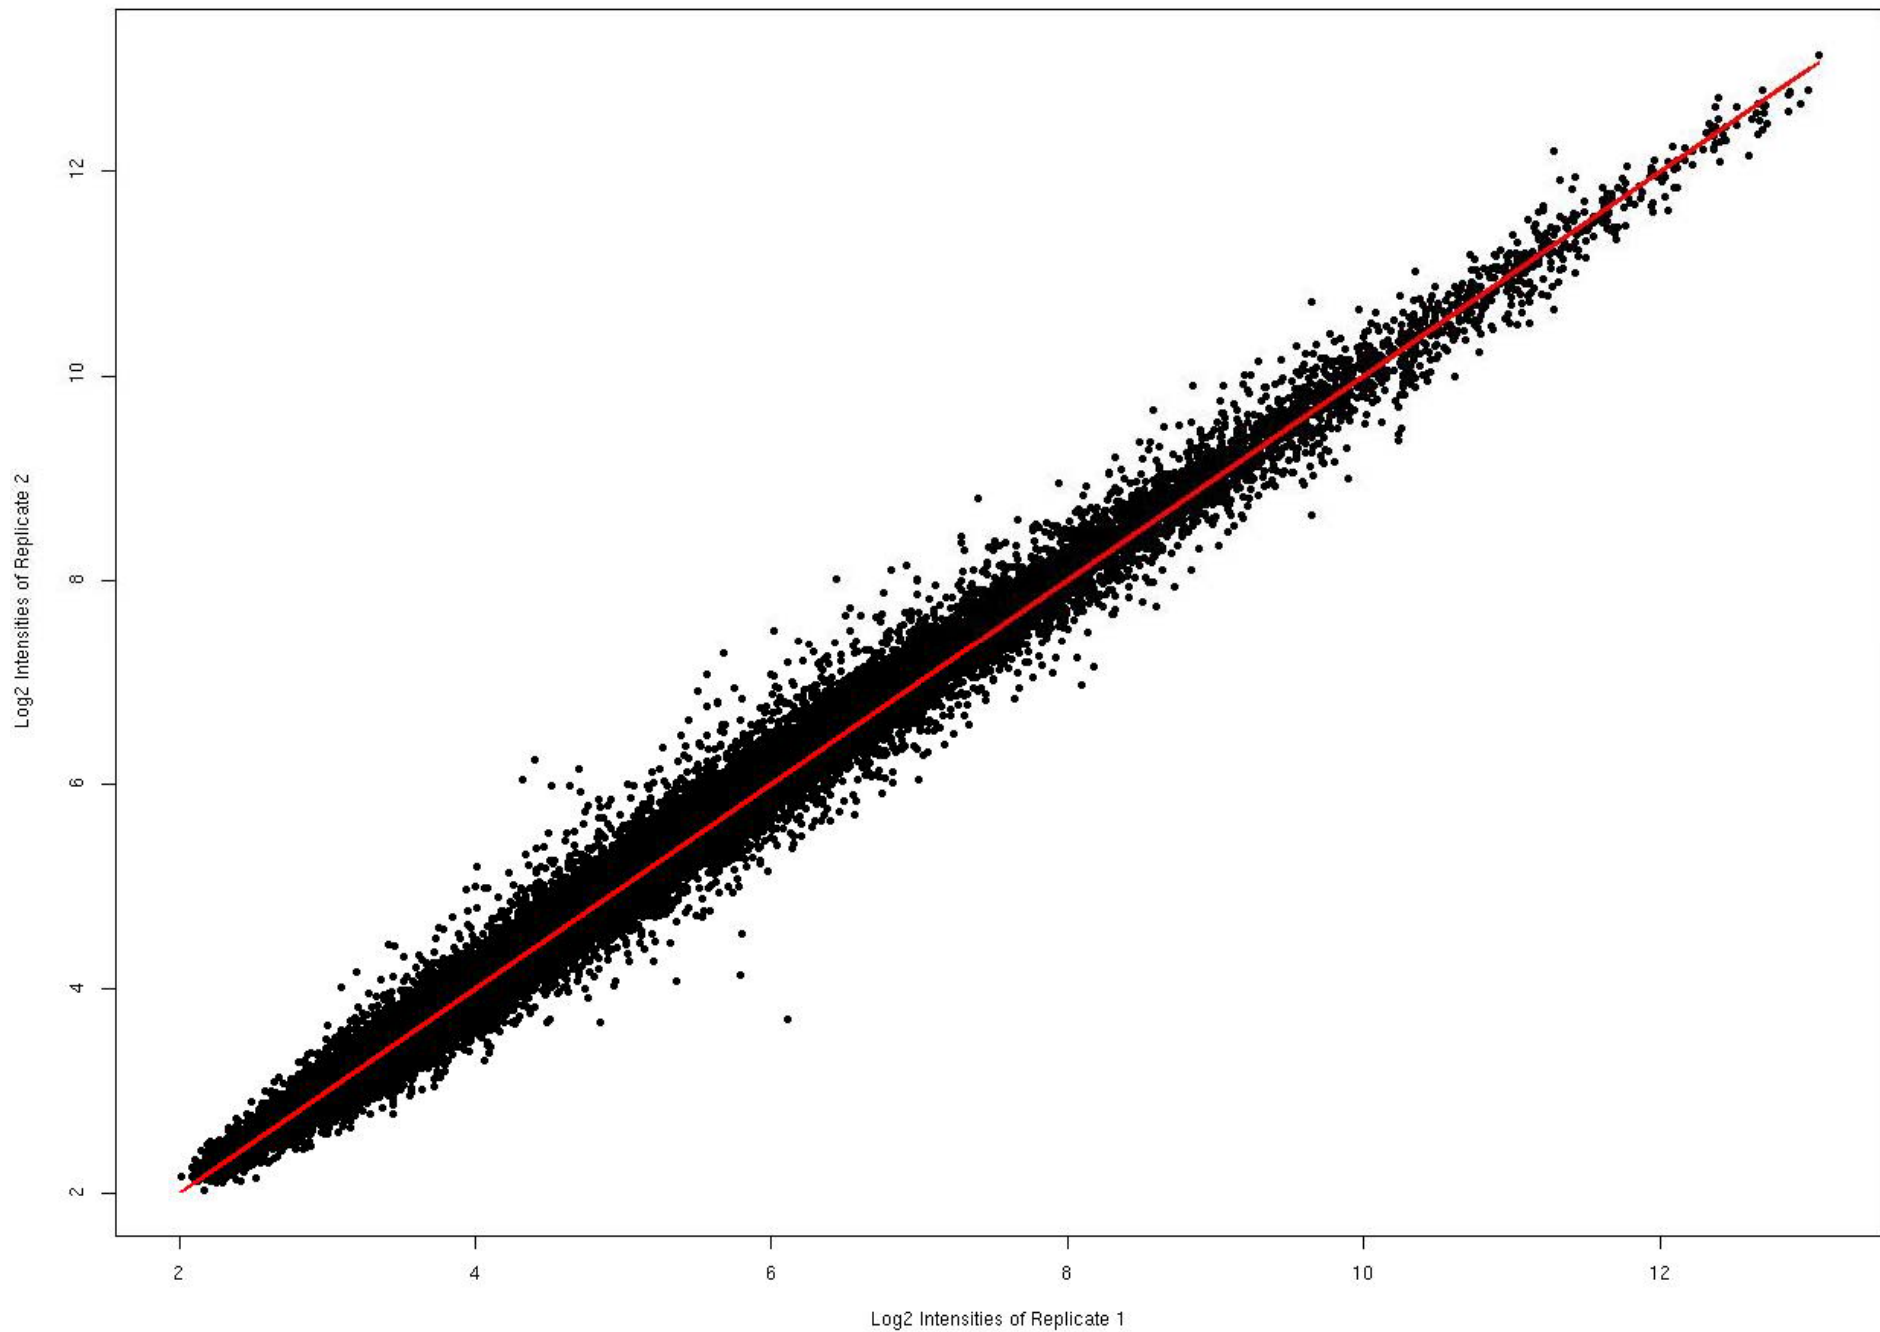

Supplement: plntcell_tpc.104.026971_3.pdf [file plntcell_tpc.104.026971_3.pdf]
